# Supplementary material for: Treatment outcome of class II malocclusion therapy including extraction of maxillary first molars: a cephalometric comparison between normodivergent and hyperdivergent facial types
Source: PeerJ. 2022 Dec 12;10:e14537. doi: 10.7717/peerj.14537 (PMC9753754; doi:10.7717/peerj.14537)
Supplement: Supplemental Information 1 [file peerj-10-14537-s001.xlsx]

## Sheet: T0
	PATIENTS
INITIAL	1	2	3	4	5	6	7	8	9	10	11	12	13	14	15	16	17	18	19	20	21	22	23	24	25	26	27	28	29	30	31	32	33	34	35	36	37	38	39	40	41	42	43	44	45	46	47	48	49
SOFT TISSUE
UL-Eplane	-1.9	5.8	0.4	-0.6	3.1	-0.3	5.4	-0.4	0	1.1	-3.7	-2	-2.8	-3.2	1.5	0.2	-1.4	-1.2	-1.9	-1	0.2	0.8	-2.2	-6.5	-5.1	0.2	-0.2	-0.6	-2.3	3.5	1.4	5.1	0.4	2.2	-2.3	-3.7	-3.7	-6	2	-3.7	1.8	x	0.3	-1.7	0.8	-2.5	-2.3	-5.4	0.1
LL-Eplane	-0.6	3.5	2.5	1.0	4.4	-3.7	7	-1.1	1.6	2.3	-2.4	0.2	-5.8	-2.9	3	-0.6	0.3	-1.6	-2.6	-1.8	-1.1	2.4	-0.8	-2.4	-1.8	0.6	-0.2	-2.8	-3	2.4	0.3	5	-0.3	1.9	2.1	2.1	-3.6	-6.5	-1.3	-0.6	0.5	x	0.8	1.2	1	-3.3	-1.1	-5.6	-3.2
UL - TVL	-1.1	2.7	3.3	1.7	1.4	3.9	3.3	3.5	3.4	3.9	0.4	0.5	4.1	-1.8	2.4	0.1	0.3	1.1	-1.1	2.2	1.9	2.2	2	-3.9	-1.8	2.8	3.3	1.8	1	4.5	2.3	1	-0.7	4.8	-0.4	-2.1	-0.8	-2.2	3	-0.5	1.8	x	2.8	0.8	-0.7	2.6	0.9	1.5	1.8
LL - TVL	-5.9	-4.4	-0.3	-1.1	-2.5	-2	-0.8	-1.1	-0.6	1.8	-1.6	-2.3	-1.9	-7.6	-5.1	-5.8	-3.1	-3.4	-7.4	-2.6	-5.6	-1.5	-0.5	-7	-1.9	-0.4	0.5	-5	-4.1	-1.6	-5.3	-5.2	-7.1	0.5	0.2	-5.4	-3.3	-5.9	-5.5	-0.4	-3.5	x	-0.1	-0.5	-5.1	-2.1	-1.5	-1.9	-4.5
NLA	129.6	123.9	95.8	118.1	117.2	112.5	117.1	111	113.8	113.5	123.8	115.7	96.2	122.8	119.9	123.1	114.7	110.9	119.1	111.8	113	114.8	114.8	123.5	122.2	116.7	117.1	114.3	119.1	115.4	105.9	124.4	120.9	108	116.4	111.2	140.7	124.4	117	117	112.6	x	121.2	116.4	117.9	104.4	120.9	109.5	120.5
PgC - TVL	-14.4	-20	-16	-10.8	-21.5	-5.2	-20.4	-8.2	-9.8	-5.6	-6.2	-11	-3.3	-16.3	-17.1	-15.2	-11.4	-11.1	-15	-8.8	-14.9	-14.5	-6.2	-18.8	-7.2	-9.6	-6.5	-8.8	-8.7	-9.5	-16.9	-20.3	-21.1	-7.4	-15.5	-16.8	-4	-7.2	-10.8	-5.2	-11	x	-6.2	-9	-20.8	-5.4	-10.5	-4.5	-8.2
SKELETAL
SNA	88	81.9	79.6	88.2	81.5	78.9	80	80.3	87.4	84.5	84.9	81.3	79.2	80.3	70.9	84	76.1	84.2	80.4	77.5	84.2	82.2	89.4	83.8	79.7	80.1	88.2	85.4	80.3	90.6	81.6	84.7	75.8	81.8	82.6	84.8	84	84	83.4	81.5	86.9	x	81.2	77.9	82.5	85	81	81.3	86.5
SNB	80	68.9	72.9	77.6	72.8	74.4	71.8	74.4	79.5	75.8	79.3	76	74.5	73.2	66.7	75.6	71.3	80.4	75.1	71.9	74.7	75.4	81	78.5	73	74.7	78.8	72	77.1	83	73	72.2	68	71.4	72.9	76.3	77.4	77.9	74	75.4	77.5	x	72.7	71.2	72.4	78.1	74.5	74.9	75.2
ANB	8	13	6.7	10.6	8.7	4.4	8.2	5.9	7.9	8.8	5.6	5.3	4.7	7.1	4.3	8.4	4.7	3.8	5.3	5.6	9.5	6.9	8.3	5.3	6.7	5.4	9.5	13.4	3.2	7.5	8.6	12.5	7.8	10.4	9.7	8.5	6.6	6.1	9.5	6.1	9.4	x	8.5	6.7	10.1	6.9	6.5	6.4	11.2
SNPg	80.8	68.5	74.1	78.1	72.7	76.5	71.3	75.8	80.2	77.1	80.6	76.5	77.7	74.6	67.2	76.9	72.5	82	76	72.8	75.4	74.6	83.4	80.4	74.5	76.2	80.1	74.1	79.1	83.4	75.5	71.6	69.1	71.6	73.1	76.6	79.4	80.7	75.5	76.4	78.1	x	72.9	71.8	73.7	79.6	74.8	77	76
SN^SnaSnp	3.2	9.5	4.2	5.7	4	4.8	5.9	6.1	1.5	5.3	7.3	0.2	6.2	10.7	6.5	6.8	8.7	-0.3	10.4	6.9	8.5	7.7	1.9	6.5	9.4	5.4	6.1	8.5	10.9	-0.6	5.9	10.9	8.2	10.3	8.1	5.3	9.1	7.9	4.6	4.4	2.8	x	2.2	10.1	9.8	9	4.9	3.9	7
SN^GoGn	30.4	48.3	38.4	28.5	34	28.5	39.6	36.9	32.1	30.3	27.1	35.3	33.5	35.4	47	35.4	43.7	29.2	34.6	33.7	38.8	36.2	28.8	34.6	36	36	35.4	31.4	28.1	20.8	34.2	40.6	38.9	39.5	33.8	31.2	37.4	23.9	35.7	34.2	28.6	x	36.8	40.2	40	25.2	37.9	34.9	33.3
SnaSnp^GoGn	27.2	38.8	34.2	22.8	30	23.7	33.8	30.8	30.7	25	19.9	35.1	27.3	24.7	40.4	28.5	35.1	29.5	24.2	26.8	30.3	28.5	26.9	28.1	26.6	30.6	29.3	22.9	17.2	21.5	28.3	29.7	30.7	29.2	25.6	25.9	28.3	16.1	31.1	29.8	25.8	x	34.6	30.1	30.2	16.1	33	31	26.3
PTV-A	52.2	53.3	51.6	50.7	49.6	50.7	51	51.7	49.5	47.9	52.6	48.8	52.8	50.1	49.4	48.6	44.7	51.4	46.7	48.8	46.1	52.8	49.9	48.9	48.3	52.7	55.2	53.9	49.6	52.9	55.3	52.9	47	54	52.8	46.4	53.7	52.3	53.1	54.8	51.5	x	48.4	49.9	47	59	47.7	49.7	49.3
PTV-B	42.1	37.6	38.9	37.7	34.6	44.9	38.7	44.5	42.6	40.8	46.5	38.5	47.9	36.8	39.1	36.2	36.5	44.6	37	37.7	31.2	44.7	39.9	36.6	38.4	46.2	46.6	39.9	43.5	45.5	42.4	36.2	28.7	42.1	36.1	33.1	49.3	45.1	42.9	49.2	39.4	x	37.9	38.8	31.3	52.2	38.2	40.5	37.7
Sna-Me	69.9	71.3	67.1	61.4	66.6	59.5	70.8	69.4	68.6	59.5	55.5	69.2	63	67.7	75.8	72.4	77.6	58.4	68.2	68.7	63.3	65.3	66.7	69.9	65.6	66.1	63.4	60.6	61.1	58.6	67.6	62.1	71.4	60.6	68.3	62.3	62	58.2	69.6	61	64.9	x	62.8	67.3	68	58.2	64.1	67.6	68.6
Co-Pg	106.4	98	109.9	102.1	100.1	104.7	104.8	110.3	108.1	96	103.2	108.5	109	107.1	104.1	114.8	111	104.2	109.5	103.5	102.3	105.5	109.8	112.8	105	110.5	109	101.1	112.3	104.3	112.1	98.9	107.6	102.1	105.4	97.4	109.3	103.6	107.8	105.6	103.2	x	98.5	105.9	101.8	110.9	95.7	107.9	104
OCCLUSAL PLANE
SN^PO	16.3	27.9	21.8	18.0	25	19.2	26.9	21	13.8	18.2	18.8	19.4	20.5	23.5	24.2	21.2	25.9	12.6	18.2	18.7	25.2	18.9	7.9	17.6	20.3	21.2	17.1	22.4	17.8	13.8	21.3	27.8	26.3	23.9	22.5	16.5	21.1	16	17.8	25	16.8	x	22.4	24.1	20.7	15.1	19.3	18.4	21
SnaSnp^PO	13.1	18.4	17.6	12.3	21	14.3	21	14.9	12.4	12.9	11.5	19.2	14.3	12.7	17.7	14.3	17.2	12.8	7.8	11.8	16.7	11.2	6	11	10.9	15.8	10.9	13.9	6.8	14.4	15.4	16.9	18.1	13.6	14.4	11.2	12.1	8.1	13.2	20.6	14	x	20.2	14	10.9	6.1	14.4	14.5	14
GoGn^PO	14.1	20.5	16.6	10.5	9	9.4	12.7	15.9	18.3	12.1	8.3	15.9	13	12	22.7	14.2	17.9	16.6	16.3	15	13.6	17.3	20.9	17	15.7	14.8	18.3	9.1	10.3	7	13	12.7	12.7	15.6	11.2	14.7	16.3	8	17.9	9.1	11.9	x	14.5	16.1	19.3	10	18.6	16.5	12.3
ANGULAR DENTAL
SN^U1	112.7	88.1	109.7	101.2	104.1	109.9	103.3	104.2	115.2	111.8	102	103.4	113	94.3	108	116	99	113	106.5	112.1	93.9	111	110.8	105.9	105.5	108.7	111.4	90.3	117.2	116.1	109.3	98.9	92.2	103.4	105.4	108.1	104.9	105.6	104.7	106.1	120	x	99.1	94.2	111.8	104.5	100	100.5	101.6
SN^U4	90.8	74.2	78.2	83.4	73	93	76.6	87.9	83.5	75.2	81.4	89.2	89.5	79.8	80.7	84.2	76.1	89	84.7	78.3	92.5	76.3	89.8	95	76	86.8	79.7	79.3	89.2	94.9	85.4	81.6	81.8	79.4	79.6	96.5	80.1	86.7	84.9	82.9	89.4	x	81.2	81.2	80.4	87.2	83.6	83.6	78.1
SN^U5	78.5	70.7	76.7	75.9	67.5	75.2	68	83.3	77	65.5	84.8	75.4	80.3	72.9	70.3	72	71.1	87.5	74.8	69.8	79.5	69.1	82.8	87.1	71.2	75.8	75.5	73.1	72	84.2	73	71.1	76.1	73.5	70	82.2	73.4	79.8	73.4	74.6	80.9	x	74.7	68.1	68.5	74.5	78.2	75.7	73.8
SN^U6	69.2	62.5	66.2	60.6	78.8	82.2	80.9	72.9	76.7	75.8	82.5	77.4	74.2	71.6	66.6	74.5	66.9	85.3	70.0	68.6	77.7	67.8	78.7	74.4	69.1	84.1	77.9	72.4	67.7	84.3	73.4	60.3	71.5	69.8	77.7	75.1	71.3	70.7	76.6	71.5	76.0	x	71.4	73.5	70.5	75.4	78.8	70.0	71.6
SN^U7	66.1	49.6	58.4	41.7	61.5	61.6	47.5	59.1	59.6	58.2	69.9	63.4	58.5	61.1	57.6	59.7	56.4	66.5	60.5	60.4	60.5	55.2	62.3	62.7	60.6	68.6	57.1	58.2	58.5	72.3	59.9	49.4	59.3	64.6	69.9	71.4	60.2	62.7	65.4	55.8	64.3	x	63.2	56.9	63.6	56.5	69.2	67.2	57.2
Sna-Snp^U1	115.8	97.6	113.9	106.9	108.1	114.7	109.2	110.2	116.7	117.1	109.2	103.5	119.2	105	114.6	122.8	107.7	112.7	116.9	119	102.4	118.7	112.7	112.4	114.9	114	117.5	98.8	128.1	115.4	115.2	109.8	100.4	113.7	113.5	113.4	114	113.5	109.3	110.5	122.8	x	101.3	104.3	121.6	113.5	104.9	104.4	108.6
GoGn^L6	79.3	69.4	73.2	89.3	74.7	79.6	79.3	75.8	72.9	85.6	74.3	72.9	71.5	78.2	69.9	73.5	66.3	74.4	75.1	80.9	70.5	74.7	69.2	70.8	73.6	69.9	67.5	82.7	81.8	80.0	69.2	79.7	76.8	74.0	70.9	74.4	70.3	81.9	72.7	72.4	76.1	x	73.1	77.0	68.3	78.1	68.3	73.0	80.5
IMPA	98.3	86	96.1	106.2	98	98.9	99.6	92.8	90.5	111.8	94	91.5	91.2	94.3	92.2	99.9	92.7	96.2	94	92.1	85.9	99.5	95.9	90.4	93.3	96	89.9	91.6	85.2	112.1	95.1	101.7	99.2	103.9	103.1	102.3	85.1	95.9	100.4	101.5	107.5	x	98.5	89.4	97.4	111.5	92.5	88	100
U1^L1	116.3	130.8	116.3	123.1	121	120.2	115.4	124.2	116.2	109.1	137.9	127.9	122.2	134.4	112	105.8	123.1	123.4	122.7	119.2	140.8	112	123.5	128.5	123.5	123.5	124.2	143.3	123.6	113.2	120.6	115.7	129	112	110.6	117.5	129.9	134.2	119.7	118.5	103.2	x	125	132.5	109	118.6	128.2	137.2	119
LINEAR DENTAL
//TVL-Inc	-0.7	-3.3	4	-4.3	2.6	3.2	5.7	0.2	6.4	5.6	1.3	-0.3	2.5	-2.1	3.3	3.1	4.7	0.3	-1	1.6	-3.3	3.2	0.3	-3.8	-1.2	1.6	3.7	-5	3	1.6	0.8	0.3	0.5	4.6	-1.5	-1.7	2.1	-3	3.4	4.5	4.4	x	1.4	0.7	3	0.1	-1	-0.5	2.7
PTV-U1 centroide	54	52.3	55.1	50.2	52.1	53.4	55.4	55.2	57.7	53.1	53.3	49.7	56.4	49.3	57.7	55	49.4	53.2	47.9	50	44.5	57.2	52.9	48.9	51.6	58.1	58.6	50.3	54.8	56.5	58.8	55.2	47.6	57.8	54.6	48.2	56.5	53.1	57.7	59.4	57.8	x	50.5	51.7	52.1	61.2	50.1	51.1	52.9
PTV-U4 centroide	36.3	37.5	34.9	33.3	34.1	37.8	36.2	38.6	39	33.7	37.1	34.2	39.3	34	38.8	35.6	29.8	36.9	31.8	34.4	30.9	37.1	36.3	33.6	32.4	39.2	39.3	33.1	35.8	39.1	41	39.1	31.9	39.2	37.5	33.8	39.3	36.9	38.5	40.9	36	x	36.2	34.3	33.4	42.2	34.4	33	33.5
PTV-U5 centroide	29.2	30.6	26.7	26.6	28	30.1	28	30.8	31.4	27.1	30.5	27.6	32.8	27	31	28.4	23.2	30.4	24.8	27.5	24.7	30.9	29.3	26.2	25.6	32.4	31.7	26.7	29.1	32	34.1	30.8	24.8	31.8	30.7	26.9	32.1	30	30.8	34.3	29	x	29.4	27.4	26.4	34	27.7	26.5	26.7
PTV-U6 centroide	21.0	20.9	17.7	18.1	18.7	21.1	18.3	22.3	23.2	18.8	22.5	18.9	25.4	18.7	22.0	19.2	15.3	21.6	16.4	19.6	16.2	23.2	21.0	16.9	18.1	24.2	22.9	18.6	21.6	23.1	26.5	22.6	16.4	23.2	22.3	18.4	24.2	21.8	22.2	25.6	19.6	x	21.5	18.9	16.8	24.5	19.5	18.4	17.9
PTV-U7 centroide	12.3	14	7.6	9.8	9.7	11.4	2.6	13	13.7	9.2	12.7	9.9	15.9	10.1	12.1	9	5.6	11.9	7.4	10.3	8	14.5	11.8	7.6	8.2	14.5	12.8	9.9	11	13	16.8	12.8	8.1	14.0	13.4	8.0	14.3	12.5	7.3	15.9	9.8	x	11.9	9.2	8.3	14.1	11.0	10.0	9.1
PTV-L1 incisale	48.7	47.5	46.0	46.9	44.9	48.2	48.7	49.7	50.3	47.3	48.5	44.9	49.9	44.4	49.4	48.6	44.7	49.7	43.2	45.4	37.8	52.7	48.8	45.0	44.5	51.4	50.8	43.1	48.3	52.0	50.9	48.3	41.3	51.6	50.4	42.1	50.5	46.8	51.5	53.8	46.5	x	45.8	46.0	43.4	58.0	44.9	44.1	45.6
PTV-L6 centroide	19.2	19.4	13.9	13.6	18.3	20.8	15.5	20.1	21.3	16.0	21.4	15.0	25.5	15.2	16.6	17.2	15.2	20.4	14.0	15.4	12.4	22.9	19.8	15.5	16.3	24.7	21.9	14.9	20.4	20.8	23.1	17.2	11.9	20.8	21.7	11.5	24.5	20.4	19.3	25.8	15.4	x	17.1	15.3	14.4	21.6	15.5	16.4	13.6
SnaSnp-U1 incisale	28	30.2	29	28.0	29	24.1	32.5	30.2	28.8	25.4	25.5	33	24.6	27.3	32.9	27.5	-32.4	24.4	28.5	28.6	27	23.8	26.2	28.4	26.2	28.4	26.2	26.2	23	24	29.7	25.8	33.8	24.4	27.8	27.6	24.5	24.9	29.1	27.1	27.3	x	27.4	28.6	24.2	23.8	-26.2	26.7	27.1
SnaSnp-U4 centroide	23.2	21.9	20.9	18.5	16.1	18.1	20.6	22.7	23.1	17.7	16.7	23.4	18.4	20.8	24.8	22.8	-24.8	17.6	24	23.2	18.8	21.5	19.7	22.4	21.7	19.1	20.7	18.4	18.5	14.9	19.9	17.9	23	17.2	21	18	18.6	18.2	20.4	17.5	20.9	x	18.7	20.4	21.5	16.4	-18.4	20	20.4
SnaSnp-U5 centroide	22.1	20	19.2	17.7	14.6	16.9	18.7	22.3	22.2	17	15.7	21.7	17.7	20.3	23	22.2	-23.3	16.8	23	22.2	19.7	20.7	19.6	22.8	21.1	17.7	19.4	16.9	18.7	14.8	19	17.3	22.4	15.9	19.4	18.4	17.1	18.6	19.7	15.3	19.4	x	17.5	18.3	20.4	16.9	-17.5	19.1	19.4
SnaSnp-U6 centroide	19.0	16.1	15.0	13.8	12.5	14.4	14.1	19.7	19.9	15.5	15.2	17.8	15.0	19.1	18.9	18.9	-19.5	14.8	21.9	19.1	17.4	18.9	18.7	20.9	17.8	16.0	17.2	13.9	16.5	12.2	16.7	14.0	21.1	13.4	16.8	16.9	14.2	17.2	16.7	11.9	16.8	x	14.0	17.0	18.4	14.9	-15.6	16.9	16.8
SnaSnp-U7 centroide	16.5	7	11	9.0	7.5	10	9.5	15.3	15.6	11.2	10.9	12.5	10.2	14.9	14.7	13.8	-15.3	9.9	18.0	16.5	11.0	14.1	16.4	16.6	14.7	12.4	12.6	11.0	13.6	8.2	12.8	8.5	15.8	10.0	13.8	13.6	10.8	13.0	9.9	7.2	12.8	x	9.7	13.1	14.6	11.6	-12.4	12.6	13.6
GoGn-L1 incisale	35.7	36.4	36.9	34.8	39.2	34.1	40.4	36.2	40.8	33.6	32.8	38.3	35.2	36.7	40.6	40.4	41.4	33.3	37.7	38.2	35.1	36.4	42.5	36.7	34.8	34.7	35.6	33.5	35.4	34.7	39.5	34.3	41.3	35.4	37.7	35.6	34.3	34.8	42.1	35.3	34.7	x	35.8	38.2	39.4	33.6	36.0	39.1	37.6
GoGn-L6 centroide	24	23.2	21.3	23.6	26.6	23.6	27.0	23.8	25.1	20.6	21.9	22.4	23.6	24.9	23.4	28.7	29.2	17.8	24.3	23.6	21.0	23.8	25.4	23.3	24.1	22.3	20.4	21.7	25.0	25.6	26.9	23.5	27.9	23.3	28.2	22.5	22.1	22.7	26.1	24.9	24.8	x	23.9	25.0	24.6	21.5	21.5	23.1	27.1
OVJ	7.3	6.5	11.2	4.8	9.8	8.4	10.7	6.9	10	8.8	7.1	8.3	9.8	6.1	10.9	7.9	5.8	5.3	6.5	8.8	8	6.5	6.8	4.2	8.1	9.2	10.2	7.2	9.2	7.6	10.3	8.3	7.9	7.6	6.1	8.3	9.5	9.4	8.9	8.4	13.4	x	6.5	6.9	9.6	5.1	6.7	8.7	8.5
OVB	-2.1	0.7	1.4	4.3	3.2	0.8	2.6	0.4	2.2	2.1	4.9	5.2	0.4	0.8	0.3	-3.4	-1.5	3.3	1.1	1.8	2.1	-4.2	5.4	-1.4	-1.9	1	2.2	5.1	1.1	2.5	4.1	-0.3	4.4	-0.1	-0.1	4.1	1.7	4.7	3.6	2.1	-2.4	x	1.7	2.1	-2.7	3.5	1.6	2.4	-1.5
[truncated: 52 more columns]

## Sheet: T1
	PATIENTS
FINAL	1	2	3	4	5	6	7	8	9	10	11	12	13	14	15	16	17	18	19	20	21	22	23	24	25	26	27	28	29	30	31	32	33	34	35	36	37	38	39	40	41	42	43	44	45	46	47	48	49
SOFT TISSUE
UL-Eplane	-5.4	-0.3	-6.2	-1.8	-2.9	-2.4	-1	-1.9	-1.7	-2.3	-3.1	-4.9	-6.6	-3.8	-0.6	-0.9	-4.8	-3.9	-5.4	-4.6	-4.1	-1.7	-2.7	-10.2	-5.3	-2.9	-2.7	-4.4	-6.2	1	-4.6	2	-2.4	-1.4	-4.3	-1.3	-7.9	-8.7	0.3	-5	-2.3	x	-4.4	-3.7	-2.5	-5.2	-4.4	-7.7	-3.6
LL-Eplane	-2.5	0.8	-3.4	-0.8	-1.7	-3.8	1	-2.7	3.1	-1.3	-2	-3	-6.3	-4.5	1.8	2.2	-1.7	-4.4	-3.8	-2.6	-3.6	1.1	-3.1	-6	-2.3	-2.8	-2.3	-2.4	-5.6	0.2	-4.1	3.1	-0.7	-0.7	1	1.3	-6	-9.5	0.7	-4.5	-0.7	x	-3.1	2.2	1.6	-5.4	-2.4	-7.6	-3.4
UL - TVL	-4.2	-4.9	0.6	1.6	-1.1	2.9	-1.9	1.3	-1	3.4	0.3	0.6	-0.6	-2.1	-1.3	-3.9	-2.5	-0.2	-1.2	-2.2	1.6	1.8	1.9	-4.4	-4	0.5	1.4	-3.4	-0.8	1.5	-2.1	-0.8	-0.5	2.6	-4	-3.2	-5	-3.3	-1.2	-1.7	-1.2	x	0	-2.8	-3.5	-0.2	-1.1	0.8	-1.4
LL - TVL	-4.6	-8.9	-0.2	-1.5	-5.5	-1.9	-6.6	-5.5	-1.5	1	-1.3	-2.1	-3.6	-7.4	-6.5	-7.8	-5.5	-4.6	-6.8	-4.6	-2.7	-1.3	-2.7	-7.3	-6.1	-4.1	-2.1	-5.3	-3.8	-3.2	-7.1	-8.8	-5.1	-1.5	-4.5	-8.4	-6.8	-7.3	-5	-5.6	-3	x	-1.1	-2.3	-4.5	-4.5	-4.6	-2.1	-5.9
NLA	133.3	137	99	118.5	118	113.1	126.3	108.6	129.7	105.5	121.7	113.5	117.4	120.5	126.2	128.6	127.4	109.8	113.1	125.8	113.6	116.5	111.3	125.1	133.4	122.1	114.5	136.1	120.6	122.6	116.5	124.4	117.4	106.8	131.5	123.7	149.1	129	130.3	122.7	124.7	x	133.2	124.8	130	119.9	119.7	104.3	121.2
PgC - TVL	-17.6	-22.2	-10.6	-9.7	-15.6	-5.9	-21.6	-14.1	-13.4	-3.9	-7.8	-8	-6.1	-14.6	-20.1	-25.5	-17.5	-10.7	-18.2	-12.5	-7.3	-9.8	-7.4	-14.5	-13.3	-9.7	-8.5	-13.5	-6.4	-10.4	-13.6	-25.3	-18.9	-8.5	-17.2	-24.4	-8.9	-6	-17.6	-11.5	-10.3	x	-4.1	-18.9	-18.8	-6.2	-12	-1.8	-11.9
SKELETAL
SNA	87.2	80.9	77	89.5	81.1	77.4	77.1	78.8	86.5	85.3	83.1	80.4	76.3	79.5	71	81.4	76.3	83.4	75.3	76.2	81.2	83.8	85.1	81.4	79.1	76.9	81.3	79.3	81	88.1	81.2	83	74.3	81.2	82.6	81.2	77.5	80.2	79.8	76.7	84	x	78.8	75	80.1	83.5	78.3	79.2	82.2
SNB	79.5	68	72.9	79.5	72.9	74.4	70.6	73.9	77.9	78.5	79.4	76.9	75.3	73.5	67	74.5	71.8	80.5	73.8	72.5	75.2	76.2	79.1	76.8	73.3	74.2	74.9	71.9	79.1	80.8	72.8	70.5	67.3	71.7	74.9	72.4	75.4	74.9	72.7	74.9	77.1	x	72.4	71	72.3	78.4	72.7	75.3	74.7
ANB	7.7	12.8	4.2	10	8.3	3	6.5	4.9	8.5	6.8	3.7	3.5	1	6	4.1	7	4.5	2.8	1.5	3.6	6.1	7.5	6.1	4.5	5.9	2.6	6.4	7.5	1.9	7.3	8.4	12.5	6.9	9.5	7.7	8.9	2	5.4	7.1	1.8	6.9	x	6.4	4	7.8	5	5.6	3.9	7.5
SNPg	80.9	67.9	74.5	79.5	73.7	76.9	71.2	75.2	79.5	80.1	81.4	77.9	78.9	74.9	67.8	75.8	73.1	82.8	75.1	74.1	76	75.2	80.9	79.4	74.8	75.9	76.4	73.2	81.3	81.9	75.4	70.3	68.4	72.5	75.2	72.9	77.6	79.3	73.9	76.1	78.2	x	73.2	72.2	73.5	80.5	74	77.9	75.3
SN^SnaSnp	1.8	8.5	4.7	6.5	5.2	3.2	7	5.2	1.8	3.6	6	-3.9	5.7	11.2	7.3	5.3	7	0.3	7.4	4	11.1	8.1	2.1	6.2	8.9	6	7.5	8.5	10.4	-0.6	6.8	10.6	10.1	11.1	5.2	10.7	8.8	9.3	3.6	4.9	2.9	x	6.1	9.8	9.5	10.2	6.5	4.4	5.8
SN^GoGn	31.4	50.5	35.3	28	36.4	32.5	44	36	30.8	28.2	27.1	37.7	33.9	34.9	46.6	35.2	44	26.4	35	31.7	39.8	35.6	29.8	36.8	34.8	36.6	39.8	30.8	31.4	23.8	35.2	41.8	40.1	39.3	33.2	35.5	40.1	27.3	33.6	33.7	27.5	x	35.6	39.7	37.5	25.9	37.5	34.6	39.3
SnaSnp^GoGn	29.7	42	30.6	21.5	31.2	29.4	37	30.8	29.1	24.6	21.1	41.6	28.1	23.7	39.4	29.9	37	26.1	27.7	27.7	28.7	27.5	27.7	30.6	25.8	30.6	32.3	22.4	21	24.4	28.3	31.3	30	28.2	28.1	24.8	31.3	18	30	28.8	24.6	x	29.5	30	28.1	15.7	31	30.2	33.5
PTV-A	51.4	48.5	50.2	52.3	52.3	50.2	48.6	47.7	48.5	50.3	54.5	50	47.7	49.7	49	47	48	51.4	43.1	47.8	49.8	51.2	48.7	50.5	48	50.4	52.4	50.9	50.3	54.8	54.9	51.6	50.8	56	51.4	48.8	48.7	50	49.7	49.7	52.7	x	46.8	50.1	48	59.2	44.9	49.8	47.4
PTV-B	38	27.7	38	41.3	39	44.9	33.6	37.1	37.6	44	51.1	43.4	43.4	38.3	35.6	31.9	39.8	44.9	33.4	37.4	42.9	42.3	38.9	40	38.4	43.4	45	40.3	46.9	45.5	41.3	33.9	34.8	43.4	34.8	31.8	44.7	42.8	37.6	44.6	43.1	x	38.4	40.3	35.2	55.2	34.4	42.9	35.2
Sna-Me	75.3	74	69.7	64.2	74.7	65.9	79	72.4	70.5	62.5	61.1	74.2	66.7	68.1	80.1	78.7	83.5	61.2	72.7	74.4	65	66.5	67.8	75.2	66.1	70.9	70.7	63.5	64.4	62.8	71.8	62.6	77.3	66.5	74.3	69.9	69.3	61.1	72.6	66.7	68.5	x	63.1	69.8	69.6	61.2	66.5	73.3	71.9
Co-Pg	109.4	98.2	111.4	105.2	110	111.2	106.9	109.8	104.9	102.5	111.7	117.9	112.5	106.6	109.6	119.2	118.9	110.5	109.4	108.7	108.7	103.5	111.2	120.4	102	113.4	113.7	101.5	115.1	107.2	113.4	99.4	114.2	110.2	113.2	105.6	113.2	108.4	110.6	109.7	108	x	100.8	109.7	101.4	116.2	98.9	113.6	106.5
OCCLUSAL PLANE
SN^PO	19.5	33.7	20.9	19.5	26.1	21	30.1	21.2	19.2	13.1	17.4	20.1	17.8	21.8	26.1	22	26.4	10.9	19.4	19.8	26.2	23.2	12.3	17.1	22.7	23.8	20.4	26.4	15.2	15.9	21.3	32.7	25.9	25.3	19	26.5	21.7	16.1	22.7	25.3	18.4	x	24.4	25	25.2	16.1	21.3	20.2	26.4
SnaSnp^PO	17.7	25.2	16.2	13	20.9	17.9	23.1	16	17.5	9.4	11.5	23.9	12.1	10.6	18.9	16.7	19.4	10.6	12	15.8	15.2	15.1	10.2	10.9	13.8	17.8	12.9	17.9	4.9	16.6	14.5	22.1	15.8	14.2	13.9	15.9	12.9	6.8	19.1	20.4	15.5	x	18.3	15.2	15.8	5.9	14.9	15.8	20.6
GoGn^PO	11.9	16.7	14.4	8.5	10.3	11.5	13.9	14.8	11.6	15.2	9.6	17.7	16.1	13	20.5	13.2	17.6	15.5	15.7	11.9	13.6	12.4	17.5	19.7	12	12.8	19.4	4.5	16.2	7.8	13.8	9.1	14.2	14	14.2	8.9	18.4	11.2	10.9	8.4	9.1	x	11.2	14.7	12.3	9.8	16.2	14.4	12.9
ANGULAR DENTAL
SN^U1	103.2	82.7	104.6	104.6	101.9	108.2	97.5	101.3	100.5	109.2	110.1	99.1	104.5	99.6	101.3	109.8	92.3	116.9	111.9	107.1	105.2	98.6	108.8	98.9	101	102.5	101.3	94.4	104.7	107	92	94.1	94.7	93.3	102.4	98.3	107.8	103.3	107.8	109.9	106.8	x	103.2	106.3	106.4	111.3	97.7	105.6	101.7
SN^U4	83.9	58.9	77.8	72.9	69.2	77.5	70.9	77.6	76.6	82.4	80	81.7	80.6	73.9	75.9	72.5	80.8	88.5	82.4	74.3	80.1	82	79.8	86.4	65.2	73.2	70.2	74.6	82.5	84.3	70.9	62.8	67	71.6	74.2	75.3	82.8	71.9	74.9	85.2	78.3	x	71.2	73.3	73.9	85.7	76.9	87.8	71.6
SN^U5	71.2	52.8	64.2	62.9	63	68.8	64.6	68.2	66.6	70	75.9	67.1	70.6	62.2	66	64.8	70.9	80.8	69.6	64	72.4	78.2	68	76.2	59.7	60.7	64.1	68.3	74.6	75.1	63.7	49.2	69.1	65.9	64	57.1	70.6	62.1	60.8	70.5	61.4	x	59.4	63.2	58.5	77.8	64.2	81.1	67.2
SN^U6	x	x	x	x	x	x	x	x	x	x	x	x	x	x	x	x	x	x	x	x	x	x	x	x	x	x	x	x	x	x	x	x	x	x	x	x	x	x	x	x	x	x	x	x	x	x	x	x	x
SN^U7	67.1	59	64	66.5	69	67.1	56.2	67.1	76.5	72.6	77.4	66.2	79.6	66.6	68.2	69.5	70.5	71.2	61.5	78	72.2	74.2	80.9	72.1	77.2	78.3	73.4	66.1	68.1	69.7	72	55.8	63.8	68.2	73.4	60.3	74	70	74.5	66.9	70.4	x	67.2	56.6	73.5	71.8	59.8	68.2	68.6
Sna-Snp^U1	104.9	91.2	109.3	111.1	107	111.4	104.5	106.5	102.3	112.8	116.1	95.3	110.2	110.8	108.5	115.1	99.4	117.2	119.3	111.1	116.3	106.7	110.9	105.1	109.9	108.5	108.9	102.9	115.1	106.4	98.9	104.7	104.8	104.4	107.6	109	116.6	112.6	111.4	114.8	109.6	x	109.3	116.1	115.9	121.5	104.2	109.9	107.5
GoGn^L6	73.9	70.9	74.5	75.6	69.2	74.1	70.3	74.7	72.8	74.0	77.1	67.2	63.6	77.9	61.7	69.7	63.6	63.6	65.1	72.4	66.1	68.0	66.1	67.7	69.0	71.7	64.8	74.5	68.0	79.1	68.7	79.1	69.8	71.0	72.5	74.1	64.9	75.4	65.1	74.8	77.7	x	72.6	71.5	67.4	74.7	70.6	69.8	69.5
IMPA	99.7	91.5	99	112.5	104.5	101.2	102.3	103.7	102.2	115.8	99.2	90.5	99.4	94.7	99.3	104.9	89.5	100.4	91.6	107	87.4	103.8	100.4	91.9	100.2	93.4	102.9	101.4	87.4	115.7	97.8	105.6	106.3	101.1	96.9	111.4	86.6	104.4	110.2	101.9	113.4	x	105.5	98.1	99.1	114.2	97	97.2	97.5
U1^L1	123.5	129.6	122.3	114.8	117.5	115.6	115.4	117.7	120.9	113	124.2	132.1	121.7	130.8	109.5	105.4	130.4	117.3	119.1	109.6	125.1	122.1	120.3	130.8	122.9	129.1	117.2	128.5	134.7	115.1	133.1	112.8	117.3	123.5	120.2	114.1	124.1	123.8	108.6	113.6	110.8	x	117.4	113.1	114.7	110.5	125.7	121.1	116.8
LINEAR DENTAL
//TVL-Inc	-6.4	-7.8	-0.4	-3.2	-2.8	-1.1	-6	-4	0.5	1	4	-1.3	-1.9	-3.2	-2.2	-3.3	-1.3	-0.7	-4.4	-2.2	-4.7	-1.7	-2.7	-2.1	-7.2	-5.1	-2	-3.5	0	-1.3	-5.3	-1.4	-0.3	-0.3	-5.4	-7.1	-6.7	-4.5	-0.8	-0.6	-4.9	x	0	0.8	-1.4	-1.9	-2.4	-4.1	-2
PTV-U1 centroide	49.5	43.6	50.9	50.7	52.1	52.2	48.8	48.2	51.5	52.8	57.4	51.2	49.8	49.1	51.2	50.2	48.2	52	43.4	49.3	48.7	52	49.4	51	47.1	51.7	53.8	48.8	54.2	55	52.6	49.9	51.2	56.1	51.1	47.3	51	49.7	51.3	53.1	54.6	x	48.9	51.3	48.8	60	45.1	50.7	47.3
PTV-U4 centroide	33.7	27.5	34	33.4	35.5	33.6	30.3	30.6	34.2	34.5	40.4	34.5	36.6	31.9	34.1	31.2	31.4	36.6	27.3	32.6	34.7	34.2	34.7	34.4	29.8	33.1	35.9	34	36.2	37.3	37.6	32.7	34.2	38	34.5	29.8	33.7	32.9	32.9	35.8	36.5	x	31.6	34.1	32.3	41.6	29.3	34.2	30
PTV-U5 centroide	26.9	22	25	26.8	29.4	26.5	23.1	23.3	27.6	27.8	33.3	27.8	30.2	25.1	27	23.9	24.2	30	20.8	25.9	28.7	27.1	28.1	26.9	23.9	26.9	28.9	27.9	28.9	30.4	30.8	26.4	27.3	31.5	27.8	23.3	27.4	26.5	26	29.7	29.6	x	25.5	27.5	26.1	34.7	22.2	27.2	23.7
PTV-U6 centroide	x	x	x	x	x	x	x	x	x	x	x	x	x	x	x	x	x	x	x	x	x	x	x	x	x	x	x	x	x	x	x	x	x	x	x	x	x	x	x	x	x	x	x	x	x	x	x	x	x
PTV-U7 centroide	18	14.4	15.8	18.9	21.1	17.8	15.1	15.7	18.9	18.9	25.2	18.7	22.7	17.4	18.5	15	16.1	21.5	13.3	18.2	20.9	18.5	19.7	17.9	15.4	18.4	20.9	20	20.7	22.1	23.4	18.4	19.3	22.8	19.8	14.6	19.6	18.7	17.5	22.4	20.5	x	18	18.5	17.9	25.6	15.2	18.2	16.3
PTV-L1 incisale	47.6	41.4	48.1	50.1	49.0	50.4	47.6	46.6	49.3	51.4	54.7	49.3	49.5	45.8	50.0	48.1	48.5	51.3	41.6	47.4	47.6	50.6	47.8	49.8	45.6	49.8	53.1	46.7	52.1	53.9	50.6	46.9	49.6	54.6	50.3	44.6	49.6	47.6	50.3	51.3	53.0	x	47.5	51.3	47.1	61.2	43.1	49.4	46.3
PTV-L6 centroide	19.4	14.6	17.8	19.4	20.4	20.3	16.3	16.7	20.8	19.7	28.2	18.8	24.6	16.9	19.4	16.9	19.1	22.9	13.0	18.8	22.3	20.4	20.9	19.8	16.6	19.9	23.7	20.2	22.9	22.8	24.1	18.6	20.4	23.6	20.8	15.8	23.0	19.6	18.4	22.7	21.3	x	18.8	20.7	19.0	27.0	16.5	20.0	16.6
SnaSnp-U1 incisale	31.4	30.9	30.3	27.9	31	27	33.5	31.4	31.2	25.4	26.5	32.7	-28	26.7	34.6	31.8	34.4	23.8	29.8	31.4	26.1	28.8	27.2	29.6	28.3	29.7	30	26.3	25.4	25.8	29.1	27.8	33.1	26.4	30.7	27.6	25.5	25.5	31.3	26.3	28.3	x	26.9	29.4	27.6	21.4	26.1	-29.3	29
SnaSnp-U4 centroide	24.9	20.1	21.2	20.5	19	17.4	22.3	22.7	22.1	18.8	18	21.3	-23.7	21.1	25.9	23.7	24.9	18.9	22.9	23	19	20.7	21.1	23.1	19.8	19.7	21.5	18.2	20.5	16.4	21.3	17.1	25.1	19.5	22.6	19.8	18	18.8	20.6	17.2	20.6	x	18.3	22.3	20.5	17.5	19.7	-21.1	19.5
SnaSnp-U5 centroide	23	18.3	19.2	18.9	17.1	15.4	19.7	21.1	20.5	17.6	16.7	18.2	-21.4	19.6	23.8	21.2	22.9	17.2	21.2	20.5	17.5	19.6	19.6	21.5	18.7	17.7	20.1	16.6	20.1	14.8	19.5	14.3	23.7	17	20.3	17.7	16.9	17.6	18.1	16.5	18.9	x	16.8	20.9	18.6	17.6	17.5	-19.7	17.4
SnaSnp-U6 centroide	x	x	x	x	x	x	x	x	x	x	x	x	x	x	x	x	x	x	x	x	x	x	x	x	x	x	x	x	x	x	x	x	x	x	x	x	x	x	x	x	x	x	x	x	x	x	x	x	x
SnaSnp-U7 centroide	18.7	14.5	15.4	16.8	14.8	12.3	15.2	17.5	17.7	15.6	14.5	14	-19.1	17	19.2	18.2	19.3	14.8	18.6	19	15	16.4	17.6	19.3	15.8	14.4	17.9	13.4	18.4	11.9	18	10.6	20.3	14.6	17.3	14.5	15.2	16.7	14.4	12.7	15.3	x	13.3	16.9	15.8	16.1	14.5	-17.2	14.2
GoGn-L1 incisale	37.4	37.6	38.2	34.7	40.7	35.2	41.2	36.1	39.4	35.7	33.4	37.9	34.6	37.7	42.3	44.4	42.0	34.4	39.9	39.1	35.0	36.0	37.8	40.7	34.4	36.8	37.4	32.7	36.8	33.9	38.5	33.7	43.0	37.0	41.9	39.0	36.4	34.4	40.7	36.7	38.0	x	35.8	39.1	40.9	37.2	36.7	39.5	38.6
GoGn-L6 centroide	28.2	26.7	25.3	26.3	32.0	26.0	29.2	26.6	27.8	24.0	25.4	25.5	24.2	28.0	28.2	34.7	30.2	22.7	28.4	30.5	24.5	26.2	26.7	28.0	25.8	26.8	25.5	27.5	25.1	27.1	29.4	25.8	32.3	26.0	33.1	30.4	24.9	24.7	31.4	29.0	28.4	x	26.6	26.8	30.7	26.6	25.8	27.3	28.4
OVJ	2.9	1.9	4.5	2	4.6	3.8	3.1	2.8	3.6	3.6	5.3	3.5	2.1	4.1	2.9	3.6	0.1	3	4.4	3.3	4.1	2.9	3	2.5	2.4	3.4	2.4	2.4	3.6	2.2	2.9	4.2	2.4	2.3	2.1	3.7	3.2	3.5	3.7	3.8	3	x	3.2	2.1	3.9	1.3	2.6	2.8	2.1
OVB	-1.5	-0.5	2.5	0.8	1.7	0.2	0.3	-0.5	2.1	1	1.8	1.3	0.3	0.5	0.1	-1.1	-0.5	0.6	0.9	-0.8	0.8	0.2	1	-0.3	0.8	0.9	0.9	0.1	0.9	0.2	0.7	0.1	0.2	0.6	0.5	0.2	-0.5	2.2	1.3	-1	1.4	x	0.7	-0.1	0.9	-0.4	0.1	0.8	0.2
[truncated: 52 more columns]

## Sheet: T1-T0
	PATIENTS
	1	2	3	4	5	6	7	8	9	10	11	12	13	14	15	16	17	18	19	20	21	22	23	24	25	26	27	28	29	30	31	32	33	34	35	36	37	38	39	40	41	43	44	45	46	47	48	49	50
SOFT TISSUE
UL-Eplane	-1.9	5.8	0.4	0	3.1	-0.3	5.4	-0.4	0	1.1	-3.7	-2	-2.8	-3.2	1.5	0.2	-1.4	-1.2	-1.9	-1	0.2	0.8	-2.2	-6.5	-5.1	0.2	-0.2	-0.6	-2.3	3.5	1.4	5.1	0.4	2.2	-2.3	-3.7	-3.7	-6	2	-3.7	1.8	0.3	-1.7	0.8	-2.5	-2.3	-5.4	0.1	5.2
LL-Eplane	-0.6	3.5	2.5	1.9	4.4	-3.7	7	-1.1	1.6	2.3	-2.4	0.2	-5.8	-2.9	3	-0.6	0.3	-1.6	-2.6	-1.8	-1.1	2.4	-0.8	-2.4	-1.8	0.6	-0.2	-2.8	-3	2.4	0.3	5	-0.3	1.9	2.1	2.1	-3.6	-6.5	-1.3	-0.6	0.5	0.8	1.2	1	-3.3	-1.1	-5.6	-3.2	4.3
UL - TVL	-1.1	2.7	3.3	2.3	1.4	3.9	3.3	3.5	3.4	3.9	0.4	0.5	4.1	-1.8	2.4	0.1	0.3	1.1	-1.1	2.2	1.9	2.2	2	-3.9	-1.8	2.8	3.3	1.8	1	4.5	2.3	1	-0.7	4.8	-0.4	-2.1	-0.8	-2.2	3	-0.5	1.8	2.8	0.8	-0.7	2.6	0.9	1.5	1.8	6.4
LL - TVL	-5.9	-4.4	-0.3	0.2	-2.5	-2	-0.8	-1.1	-0.6	1.8	-1.6	-2.3	-1.9	-7.6	-5.1	-5.8	-3.1	-3.4	-7.4	-2.6	-5.6	-1.5	-0.5	-7	-1.9	-0.4	0.5	-5	-4.1	-1.6	-5.3	-5.2	-7.1	0.5	0.2	-5.4	-3.3	-5.9	-5.5	-0.4	-3.5	-0.1	-0.5	-5.1	-2.1	-1.5	-1.9	-4.5	2.3
NLA	129.6	123.9	95.8	116.5	117.2	112.5	117.1	111	113.8	113.5	123.8	115.7	96.2	122.8	119.9	123.1	114.7	110.9	119.1	111.8	113	114.8	114.8	123.5	122.2	116.7	117.1	114.3	119.1	115.4	105.9	124.4	120.9	108	116.4	111.2	140.7	124.4	117	117	112.6	121.2	116.4	117.9	104.4	120.9	109.5	120.5	114.6
PgC - TVL	-14.4	-20	-16	-10.5	-21.5	-5.2	-20.4	-8.2	-9.8	-5.6	-6.2	-11	-3.3	-16.3	-17.1	-15.2	-11.4	-11.1	-15	-8.8	-14.9	-14.5	-6.2	-18.8	-7.2	-9.6	-6.5	-8.8	-8.7	-9.5	-16.9	-20.3	-21.1	-7.4	-15.5	-16.8	-4	-7.2	-10.8	-5.2	-11	-6.2	-9	-20.8	-5.4	-10.5	-4.5	-8.2	-6.9
SKELETAL
SNA	88	81.9	79.6	90.1	81.5	78.9	80	80.3	87.4	84.5	84.9	81.3	79.2	80.3	70.9	84	76.1	84.2	80.4	77.5	84.2	82.2	89.4	83.8	79.7	80.1	88.2	85.4	80.3	90.6	81.6	84.7	75.8	81.8	82.6	84.8	84	84	83.4	81.5	86.9	81.2	77.9	82.5	85	81	81.3	86.5	84.5
SNB	80	68.9	72.9	77.6	72.8	74.4	71.8	74.4	79.5	75.8	79.3	76	74.5	73.2	66.7	75.6	71.3	80.4	75.1	71.9	74.7	75.4	81	78.5	73	74.7	78.8	72	77.1	83	73	72.2	68	71.4	72.9	76.3	77.4	77.9	74	75.4	77.5	72.7	71.2	72.4	78.1	74.5	74.9	75.2	74
ANB	8	13	6.7	12.5	8.7	4.4	8.2	5.9	7.9	8.8	5.6	5.3	4.7	7.1	4.3	8.4	4.7	3.8	5.3	5.6	9.5	6.9	8.3	5.3	6.7	5.4	9.5	13.4	3.2	7.5	8.6	12.5	7.8	10.4	9.7	8.5	6.6	6.1	9.5	6.1	9.4	8.5	6.7	10.1	6.9	6.5	6.4	11.2	10.5
SNPg	80.8	68.5	74.1	78	72.7	76.5	71.3	75.8	80.2	77.1	80.6	76.5	77.7	74.6	67.2	76.9	72.5	82	76	72.8	75.4	74.6	83.4	80.4	74.5	76.2	80.1	74.1	79.1	83.4	75.5	71.6	69.1	71.6	73.1	76.6	79.4	80.7	75.5	76.4	78.1	72.9	71.8	73.7	79.6	74.8	77	76	74.9
SN^SnaSnp	3.2	9.5	4.2	6.2	4	4.8	5.9	6.1	1.5	5.3	7.3	0.2	6.2	10.7	6.5	6.8	8.7	-0.3	10.4	6.9	8.5	7.7	1.9	6.5	9.4	5.4	6.1	8.5	10.9	-0.6	5.9	10.9	8.2	10.3	8.1	5.3	9.1	7.9	4.6	4.4	2.8	2.2	10.1	9.8	9	4.9	3.9	7	9.8
SN^GoGn	30.4	48.3	38.4	28.5	34	28.5	39.6	36.9	32.1	30.3	27.1	35.3	33.5	35.4	47	35.4	43.7	29.2	34.6	33.7	38.8	36.2	28.8	34.6	36	36	35.4	31.4	28.1	20.8	34.2	40.6	38.9	39.5	33.8	31.2	37.4	23.9	35.7	34.2	28.6	36.8	40.2	40	25.2	37.9	34.9	33.3	36.6
SnaSnp^GoGn	27.2	38.8	34.2	22.2	30	23.7	33.8	30.8	30.7	25	19.9	35.1	27.3	24.7	40.4	28.5	35.1	29.5	24.2	26.8	30.3	28.5	26.9	28.1	26.6	30.6	29.3	22.9	17.2	21.5	28.3	29.7	30.7	29.2	25.6	25.9	28.3	16.1	31.1	29.8	25.8	34.6	30.1	30.2	16.1	33	31	26.3	26.7
PTV-A	52.2	53.3	51.6	52.6	49.6	50.7	51	51.7	49.5	47.9	52.6	48.8	52.8	50.1	49.4	48.6	44.7	51.4	46.7	48.8	46.1	52.8	49.9	48.9	48.3	52.7	55.2	53.9	49.6	52.9	55.3	52.9	47	54	52.8	46.4	53.7	52.3	53.1	54.8	51.5	48.4	49.9	47	59	47.7	49.7	49.3	54.1
PTV-B	42.1	37.6	38.9	38.1	34.6	44.9	38.7	44.5	42.6	40.8	46.5	38.5	47.9	36.8	39.1	36.2	36.5	44.6	37	37.7	31.2	44.7	39.9	36.6	38.4	46.2	46.6	39.9	43.5	45.5	42.4	36.2	28.7	42.1	36.1	33.1	49.3	45.1	42.9	49.2	39.4	37.9	38.8	31.3	52.2	38.2	40.5	37.7	44
Sna-Me	69.9	71.3	67.1	61	66.6	59.5	70.8	69.4	68.6	59.5	55.5	69.2	63	67.7	75.8	72.4	77.6	58.4	68.2	68.7	63.3	65.3	66.7	69.9	65.6	66.1	63.4	60.6	61.1	58.6	67.6	62.1	71.4	60.6	68.3	62.3	62	58.2	69.6	61	64.9	62.8	67.3	68	58.2	64.1	67.6	68.6	64.2
Co-Pg	106.4	98	109.9	100.6	100.1	104.7	104.8	110.3	108.1	96	103.2	108.5	109	107.1	104.1	114.8	111	104.2	109.5	103.5	102.3	105.5	109.8	112.8	105	110.5	109	101.1	112.3	104.3	112.1	98.9	107.6	102.1	105.4	97.4	109.3	103.6	107.8	105.6	103.2	98.5	105.9	101.8	110.9	95.7	107.9	104	102.2
OCCLUSAL PLANE
SN^PO	16.3	27.9	21.8	19.6	25	19.2	26.9	21	13.8	18.2	18.8	19.4	20.5	23.5	24.2	21.2	25.9	12.6	18.2	18.7	25.2	18.9	7.9	17.6	20.3	21.2	17.1	22.4	17.8	13.8	21.3	27.8	26.3	23.9	22.5	16.5	21.1	16	17.8	25	16.8	22.4	24.1	20.7	15.1	19.3	18.4	21	20.1
SnaSnp^PO	13.1	18.4	17.6	13.4	21	14.3	21	14.9	12.4	12.9	11.5	19.2	14.3	12.7	17.7	14.3	17.2	12.8	7.8	11.8	16.7	11.2	6	11	10.9	15.8	10.9	13.9	6.8	14.4	15.4	16.9	18.1	13.6	14.4	11.2	12.1	8.1	13.2	20.6	14	20.2	14	10.9	6.1	14.4	14.5	14	10.2
GoGn^PO	14.1	20.5	16.6	8.8	9	9.4	12.7	15.9	18.3	12.1	8.3	15.9	13	12	22.7	14.2	17.9	16.6	16.3	15	13.6	17.3	20.9	17	15.7	14.8	18.3	9.1	10.3	7	13	12.7	12.7	15.6	11.2	14.7	16.3	8	17.9	9.1	11.9	14.5	16.1	19.3	10	18.6	16.5	12.3	16.5
ANGULAR DENTAL
SN^U1	112.7	88.1	109.7	101.2	104.1	109.9	103.3	104.2	115.2	111.8	102	103.4	113	94.3	108	116	99	113	106.5	112.1	93.9	111	110.8	105.9	105.5	108.7	111.4	90.3	117.2	116.1	109.3	98.9	92.2	103.4	105.4	108.1	104.9	105.6	104.7	106.1	120	99.1	94.2	111.8	104.5	100	100.5	101.6	104.8
SN^U4	90.8	74.2	78.2	83.4	73	93	76.6	87.9	83.5	75.2	81.4	89.2	89.5	79.8	80.7	84.2	76.1	89	84.7	78.3	92.5	76.3	89.8	95	76	86.8	79.7	79.3	89.2	94.9	85.4	81.6	81.8	79.4	79.6	96.5	80.1	86.7	84.9	82.9	89.4	81.2	81.2	80.4	87.2	83.6	83.6	78.1	76.3
SN^U5	78.5	70.7	76.7	75.9	67.5	75.2	68	83.3	77	65.5	84.8	75.4	80.3	72.9	70.3	72	71.1	87.5	74.8	69.8	79.5	69.1	82.8	87.1	71.2	75.8	75.5	73.1	72	84.2	73	71.1	76.1	73.5	70	82.2	73.4	79.8	73.4	74.6	80.9	74.7	68.1	68.5	74.5	78.2	75.7	73.8	70.6
SN^U6	66.1	49.6	58.4	53.3	61.5	61.6	46.1	59.1	59.6	58.2	69.9	63.4	58.5	61.1	57.6	59.7	56.4	66.5	60.5	60.4	60.5	55.2	62.3	62.7	60.6	68.6	57.1	58.2	58.5	72.3	59.9	49.4	59.3	64.6	69.9	71.4	60.2	62.7	65.4	55.8	64.3	63.2	56.9	63.6	56.5	69.2	67.2	57.2	66.1
SN^U7	115.8	97.6	113.9	107.5	108.1	114.7	109.2	110.2	116.7	117.1	109.2	103.5	119.2	105	114.6	122.8	107.7	112.7	116.9	119	102.4	118.7	112.7	112.4	114.9	114	117.5	98.8	128.1	115.4	115.2	109.8	100.4	113.7	113.5	113.4	114	113.5	109.3	110.5	122.8	101.3	104.3	121.6	113.5	104.9	104.4	108.6	114.7
Sna-Snp^U1	98.3	86	96.1	106.2	98	98.9	99.6	92.8	90.5	111.8	94	91.5	91.2	94.3	92.2	99.9	92.7	96.2	94	92.1	85.9	99.5	95.9	90.4	93.3	96	89.9	91.6	85.2	112.1	95.1	101.7	99.2	103.9	103.1	102.3	85.1	95.9	100.4	101.5	107.5	98.5	89.4	97.4	111.5	92.5	88	100	102.1
GoGn^L6	116.3	130.8	116.3	123.1	121	120.2	115.4	124.2	116.2	109.1	137.9	127.9	122.2	134.4	112	105.8	123.1	123.4	122.7	119.2	140.8	112	123.5	128.5	123.5	123.5	124.2	143.3	123.6	113.2	120.6	115.7	129	112	110.6	117.5	129.9	134.2	119.7	118.5	103.2	125	132.5	109	118.6	128.2	137.2	119	117.3
IMPA
U1^L1	-0.7	-3.3	4	-4.1	2.6	3.2	5.7	0.2	6.4	5.6	1.3	-0.3	2.5	-2.1	3.3	3.1	4.7	0.3	-1	1.6	-3.3	3.2	0.3	-3.8	-1.2	1.6	3.7	-5	3	1.6	0.8	0.3	0.5	4.6	-1.5	-1.7	2.1	-3	3.4	4.5	4.4	1.4	0.7	3	0.1	-1	-0.5	2.7	4.3
LINEAR DENTAL	54	52.3	55.1	50.5	52.1	53.4	55.4	55.2	57.7	53.1	53.3	49.7	56.4	49.3	57.7	55	49.4	53.2	47.9	50	44.5	57.2	52.9	48.9	51.6	58.1	58.6	50.3	54.8	56.5	58.8	55.2	47.6	57.8	54.6	48.2	56.5	53.1	57.7	59.4	57.8	50.5	51.7	52.1	61.2	50.1	51.1	52.9	58.7
//TVL-Inc	36.3	37.5	34.9	33.5	34.1	37.8	36.2	38.6	39	33.7	37.1	34.2	39.3	34	38.8	35.6	29.8	36.9	31.8	34.4	30.9	37.1	36.3	33.6	32.4	39.2	39.3	33.1	35.8	39.1	41	39.1	31.9	39.2	37.5	33.8	39.3	36.9	38.5	40.9	36	36.2	34.3	33.4	42.2	34.4	33	33.5	37.2
PTV-U1 centroide	29.2	30.6	26.7	26.9	28	30.1	28	30.8	31.4	27.1	30.5	27.6	32.8	27	31	28.4	23.2	30.4	24.8	27.5	24.7	30.9	29.3	26.2	25.6	32.4	31.7	26.7	29.1	32	34.1	30.8	24.8	31.8	30.7	26.9	32.1	30	30.8	34.3	29	29.4	27.4	26.4	34	27.7	26.5	26.7	29.9
PTV-U4 centroide	12.3	2.7	7.6	9.4	9.7	11.4	2.6	13	14.2	9.3	13.2	10.1	15.9	10.1	12.1	9	5.6	11.9	7.4	10.3	8	14.5	11.8	7.6	8.2	14.5	12.8	9.9	11	13	16.8	12.8	8.1	14	13.4	8	14.3	12.5	7.3	15.9	9.8	11.9	9.2	8.3	14.1	11	10	9.1	10.5
PTV-U5 centroide	28	30.2	29	27.6	29	24.1	32.5	30.2	28.8	25.4	25.5	33	24.6	27.3	32.9	27.5	-32.4	24.4	28.5	28.6	27	23.8	26.2	28.4	26.2	28.4	26.2	26.2	23	24	29.7	25.8	33.8	24.4	27.8	27.6	24.5	24.9	29.1	27.1	27.3	27.4	28.6	24.2	23.8	-26.2	26.7	27.1	25.1
PTV-U6 centroide	23.2	21.9	20.9	18.5	16.1	18.1	20.6	22.7	23.1	17.7	16.7	23.4	18.4	20.8	24.8	22.8	-24.8	17.6	24	23.2	18.8	21.5	19.7	22.4	21.7	19.1	20.7	18.4	18.5	14.9	19.9	17.9	23	17.2	21	18	18.6	18.2	20.4	17.5	20.9	18.7	20.4	21.5	16.4	-18.4	20	20.4	19.9
PTV-U7 centroide	22.1	20	19.2	17.5	14.6	16.9	18.7	22.3	22.2	17	15.7	21.7	17.7	20.3	23	22.2	-23.3	16.8	23	22.2	19.7	20.7	19.6	22.8	21.1	17.7	19.4	16.9	18.7	14.8	19	17.3	22.4	15.9	19.4	18.4	17.1	18.6	19.7	15.3	19.4	17.5	18.3	20.4	16.9	-17.5	19.1	19.4	17.9
PTV-L1 incisale	16.5	7.9	11	9.5	7.5	10	7.5	15.3	15.7	11	10.7	12.1	10.2	14.9	14.7	13.8	-15.3	9.9	18	16.5	11	14.1	16.4	16.6	14.7	12.4	12.6	11	13.6	8.2	12.8	8.5	15.8	10	13.8	13.6	10.8	13	9.9	7.2	12.8	9.7	13.1	14.6	11.6	-12.4	12.6	13.6	12.5
PTV-L6 centroide	7.3	6.5	11.2	5	9.8	8.4	10.7	6.9	10	8.8	7.1	8.3	9.8	6.1	10.9	7.9	5.8	5.3	6.5	8.8	8	6.5	6.8	4.2	8.1	9.2	10.2	7.2	9.2	7.6	10.3	8.3	7.9	7.6	6.1	8.3	9.5	9.4	8.9	8.4	13.4	6.5	6.9	9.6	5.1	6.7	8.7	8.5	9.1
SnaSnp-U1 incisale	-2.1	0.7	1.4	4.2	3.2	0.8	2.6	0.4	2.2	2.1	4.9	5.2	0.4	0.8	0.3	-3.4	-1.5	3.3	1.1	1.8	2.1	-4.2	5.4	-1.4	-1.9	1	2.2	5.1	1.1	2.5	4.1	-0.3	4.4	-0.1	-0.1	4.1	1.7	4.7	3.6	2.1	-2.4	1.7	2.1	-2.7	3.5	1.6	2.4	-1.5	0.1
SnaSnp-U4 centroide
SnaSnp-U5 centroide
SnaSnp-U6 centroide
SnaSnp-U7 centroide
GoGn-L1 incisale
GoGn-L6 centroide
OVJ
OVB
[truncated: 52 more columns]
